# Supplementary material for: Annexin A1–containing extracellular vesicles and polymeric nanoparticles promote epithelial wound repair
Source: JCI journal article supplement (doi:10.1172/jci76693), 2015-02-09
Supplement: sd1 [file 1]

## Supplementary Materials:

**Figure 1S**

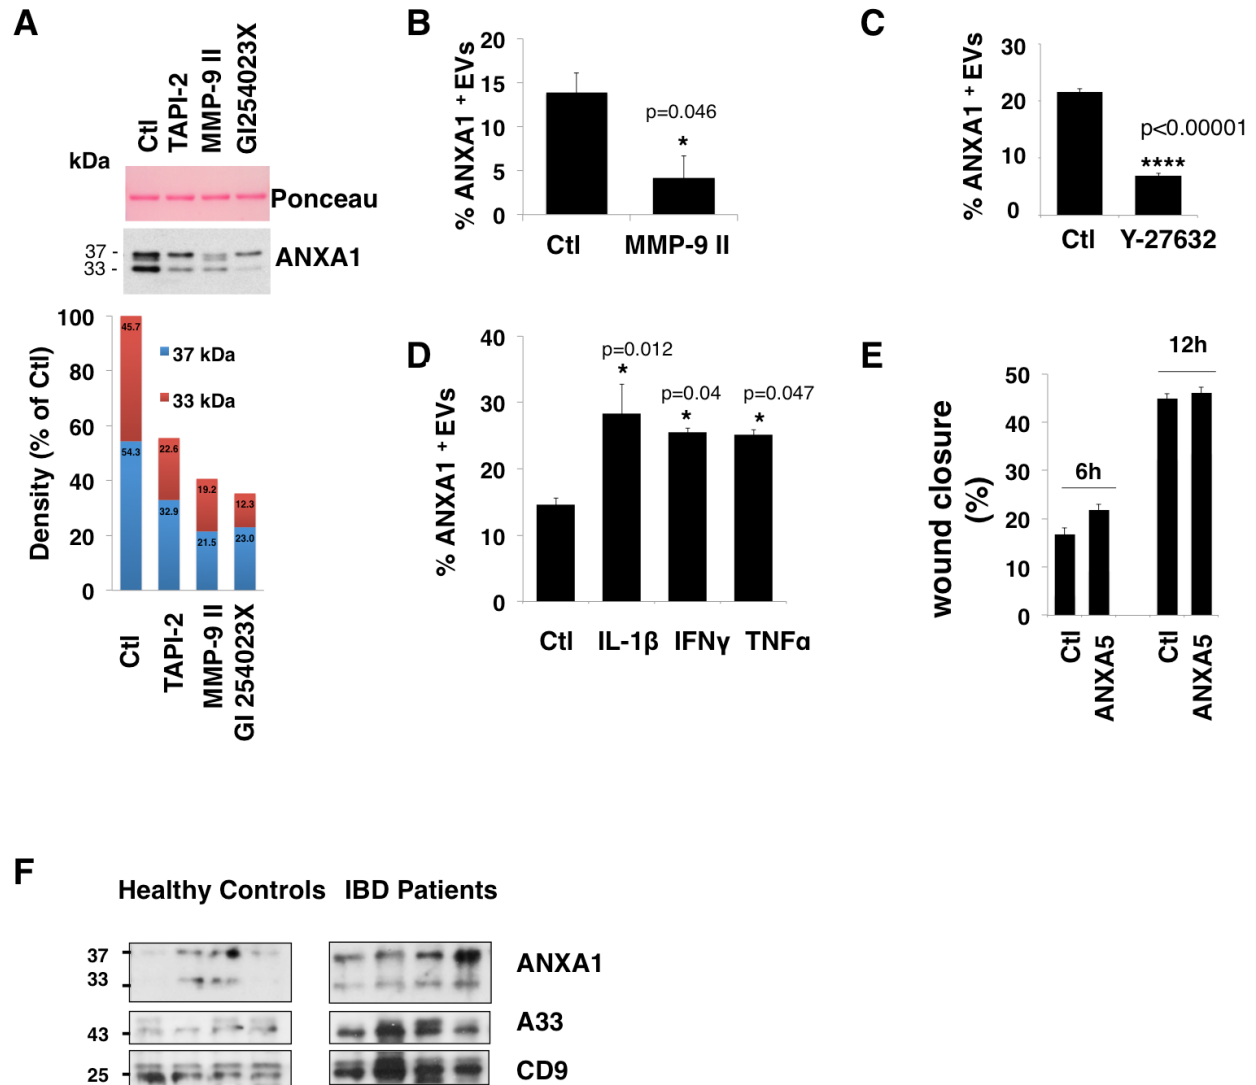

**Figure 1S. Analysis of ANXA1 release from epithelial cells.** (A) Immunoblots showing ANXA1 in supernatants of resealing wounds in the presence or absence of MMP inhibitor TAPI-2 (10  $\mu$ M), MMP-9 II inhibitor (10  $\mu$ M) and ADAM-10 inhibitor GI254023X (10  $\mu$ M). Representative immunoblots of n=3. (B-D) IECs EVs were acquired using the Imagestream<sup>x</sup> MkII. EVs were stained with BODIPY-Texas Red and conjugated fluorescent antibodies against ANXA1 Ab, n=3. (E) Scratch wound healing assay on monolayers of IEC (at 6h, left panel and

12h right panel). ANXA5 was added to wounded IECs. The experiments were repeated three times and results of one representative experiment done with five parallel samples are shown. (F) Immunoblots showing ANXA1, A33 and CD9 in exosomes isolated from human serum by EpCAM magnetic beads. Representative immunoblots of n=3.

**Figure 2S**

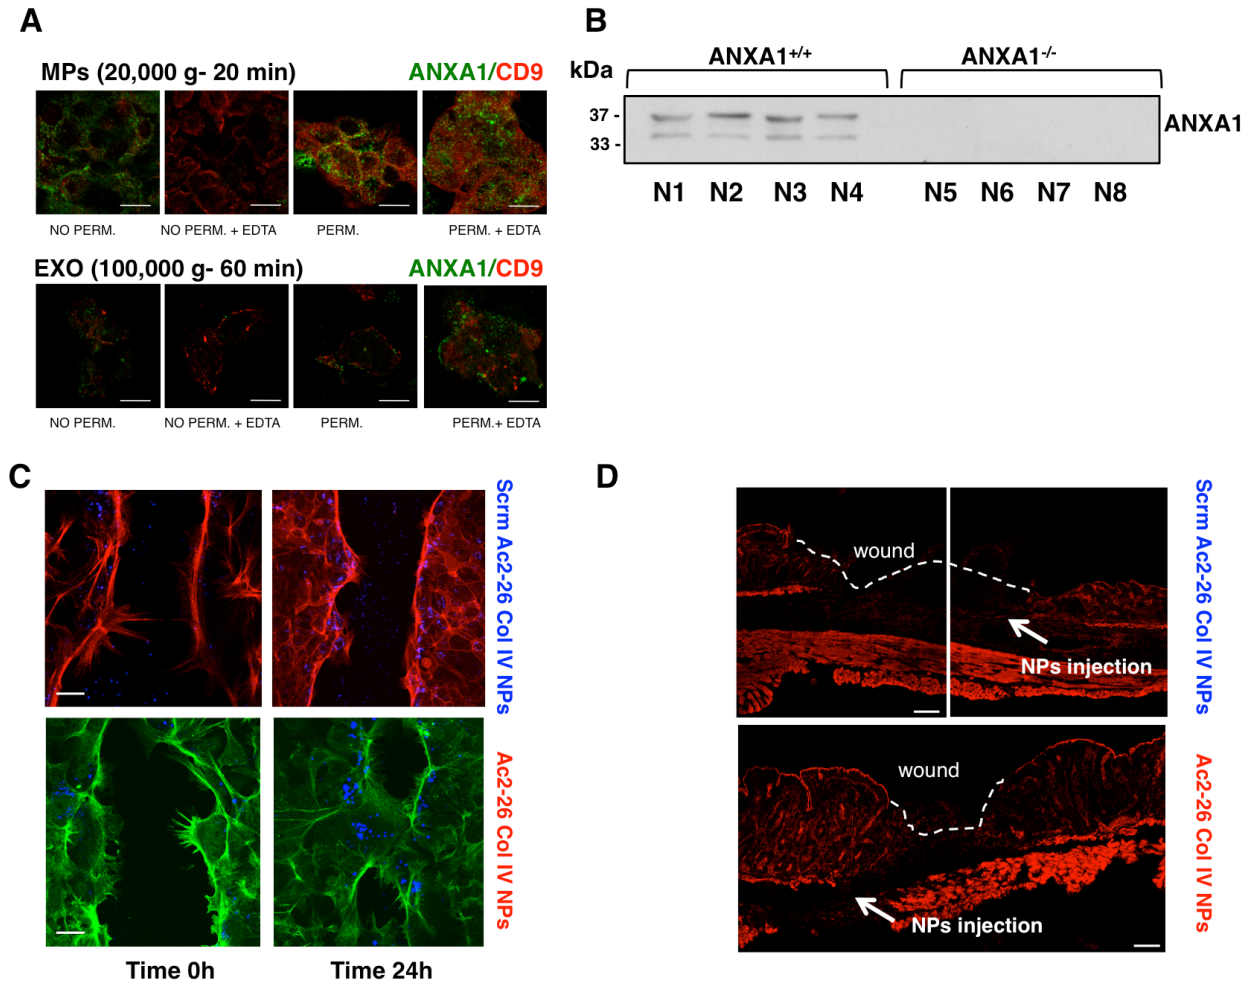

**Figure 2S. ANXA1 containing EVs derived from cultured epithelial cells and NPs localization in in vivo wounds.** (A) Confocal fluorescence microscopy of double immunolabeled EVs (ANXA1 and CD9 antibodies). No perm. (no permeabilization), no perm.+EDTA (permeabilization was not performed and EDTA was applied), perm. (permeabilization was performed), perm.+EDTA (permeabilization was performed and EDTA was applied). Scale bar 20  $\mu$ m. (B) Immunoblots showing ANXA1 protein in *ex vivo* resealing wounds in ANXA1<sup>+/+</sup> and ANXA1<sup>-/-</sup> mice. (C) Representative images of resealing wounds *in vitro* showing F-actin, AlexaFluor555 phalloidin (Red-panel), AlexaFluor488 Phalloidin (Green-panel) and NPs (Alexa 647, Blue) after Scrm Ac2-26 Col IV NPs or Ac2-26 Col IV NPs treatment. Scale bar 10  $\mu$ m. (D) *In vivo* colonic mucosal wounds injected with Scrm Ac2-26 Col IV NPs (1) and Ac2-26 Col IV NPs (2) harvested and labeled with AlexaFluor555 phalloidin Red-panel to

visualize the architectural organization of the epithelium. Scale bar 50  $\mu$ m. The experiments of this figure were repeated three times and results of one representative experiment done with five parallel samples for A and C, with four mice for B and D are shown.

**Table S1 Scoring of disease severity of human patients**

| Patient # | Preoperative Endoscopic Findings                     | Postoperative Histology                                        |
|-----------|------------------------------------------------------|----------------------------------------------------------------|
| 1         | high grade ulcerative colitis                        | acute ulcerative colitis with moderate to severe inflammation, |
| 2         | acute inflammation*                                  |                                                                |
| 3         | no endoscopy                                         | active Colitis/ Crohns disease                                 |
| 4         | low grade inflammation, stenosis                     | inflammatory stenosis, low grade inflammation                  |
| 5         | low grade inflammation, perianal fistulating disease | Crohn's disease, low grade inflammation, chronic disease       |
| 6         | severe Colitis                                       | severe chronic colitis                                         |
| 7         | mild acute colitis                                   | clinical diagnosis                                             |
| 8         | inflammatory stenosis                                | severe chronic colitis, Crohn's disease                        |
| 9         | high grade inflammation of whole colon               | active ulcerative colitis, high grade inflammation             |

**Table S1:** Histological scoring of IBD patient intestinal inflammatory activity shown in Figure 4 (\* diagnosis is based on clinical presentation).
